# Supplementary material for: Comparative genomics and transcriptomics of the Spiroplasma glossinidia strain sGff reveal insights into host interaction and trypanosome resistance in Glossina fuscipes fuscipes
Source: Research Square preprint supplement (doi:10.21203/rs.3.rs-7295611/v1), 2025-08-25
Supplement: Supplementary file 1 [file 8bce08378578b699a64a05ee.docx]

Comparative genomics and transcriptomics of the *Spiroplasma glossinidia* strain *s*Gff reveal insights into host interaction and trypanosome resistance in *Glossina fuscipes fuscipes*

Daniel J. Bruzzese1*, Fabian Gstöttenmayer1,2*, Brian L. Weiss1, Hager Khalil2, Robert Mach3 Adly M.M Abd-Alla2, and Serap Aksoy1

*1Department of Epidemiology of Microbial Diseases, Yale School of Public Health,  New Haven, CT, United States*

*2Insect Pest Control Laboratory, Joint FAO/IAEA Centre of Nuclear Techniques in Food and Agriculture, Vienna, Austria*

*3Institute of Chemical, Environmental, and Bioscience Engineering, Vienna University of Technology, Gumpendorfer Straße 1a, 1060 Vienna, Austria.*

* equally contributing first authors

Corresponding authors:

Daniel J. Bruzzese; email: daniel.bruzzese@yale.edu

Fabian Gstöttenmayer; email: [fabian.gstoettenmayer@yale.edu](mailto:fabian.gstoettenmayer@yale.edu)

**Supplementary Figures 1-4:**


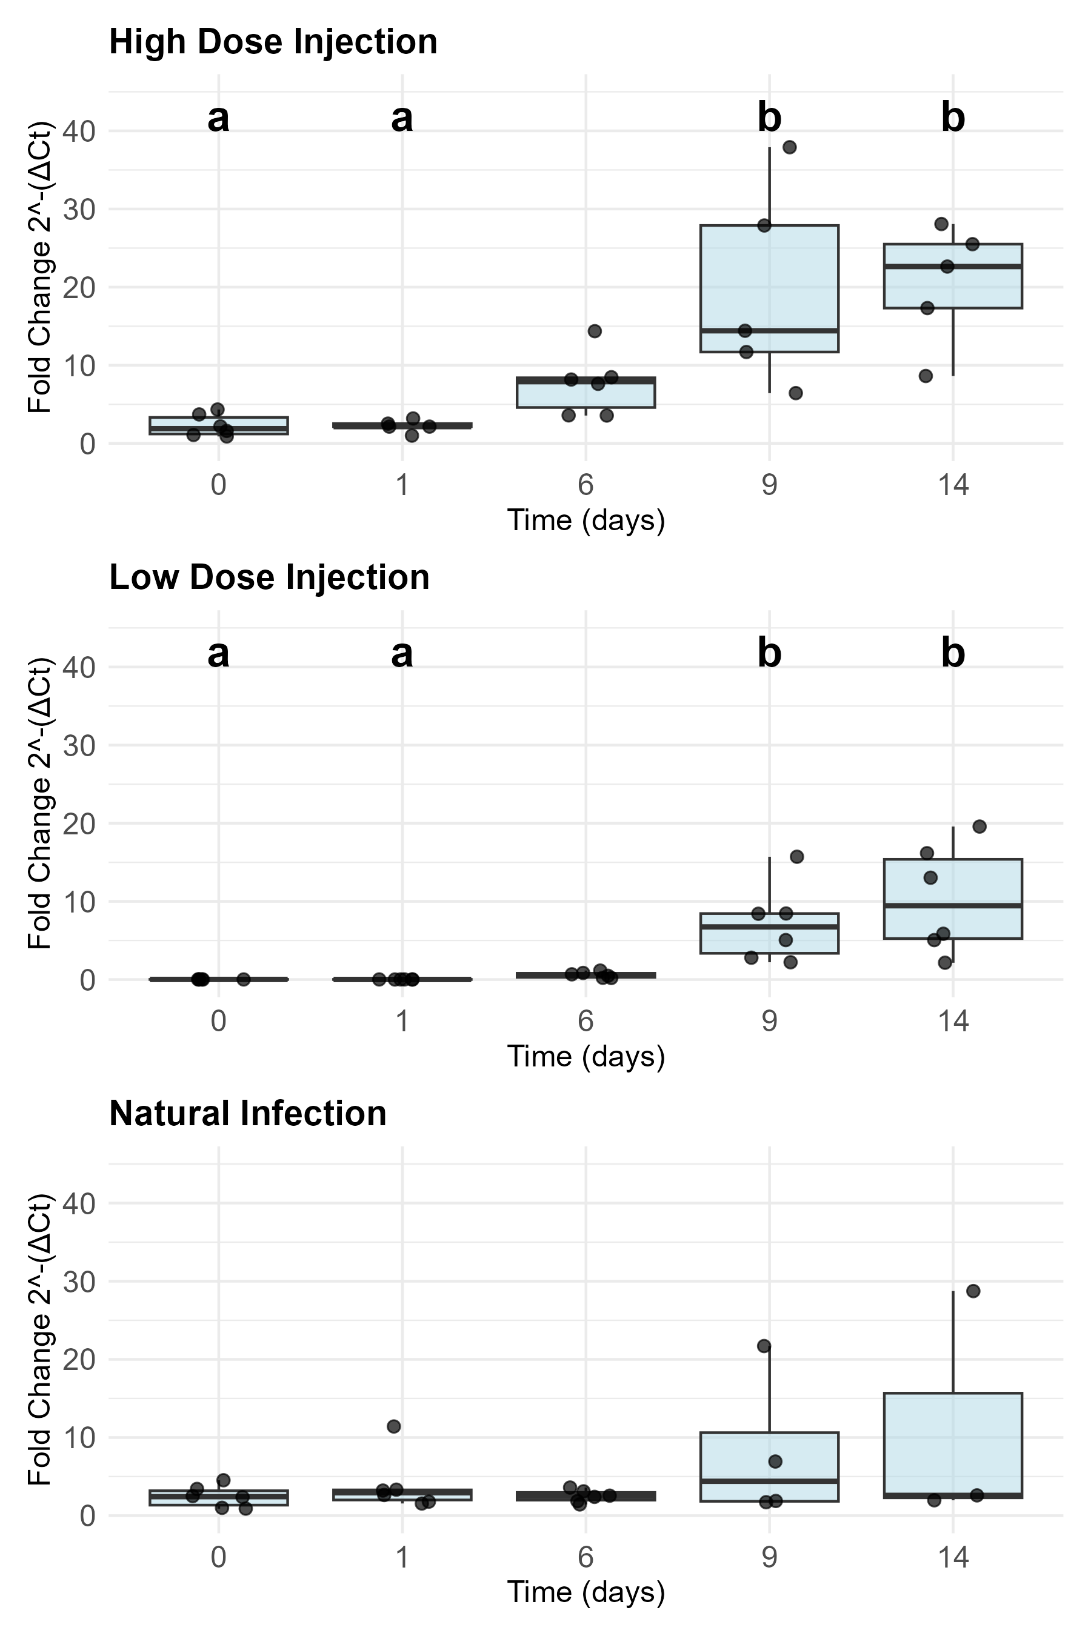


**Supplementary Figure 1**. Relative quantification of *s*Gff in injected naive and naturally infected *Gff* over 14 days. Teneral *s*Gff negative *Gff* flies were injected with high and low doses of cultured *s*Gff. *Gff* with a natural infection of *s*Gff were kept as a control group. Whole fly samples were collected on days 0, 1, 6, 9 and 14 and subjected to quantitative PCR (qPCR). *s*Gff fold-change over time was calculated by normalization to housekeeping gene β-tubulin and according to the 2-(ΔCt) formula.


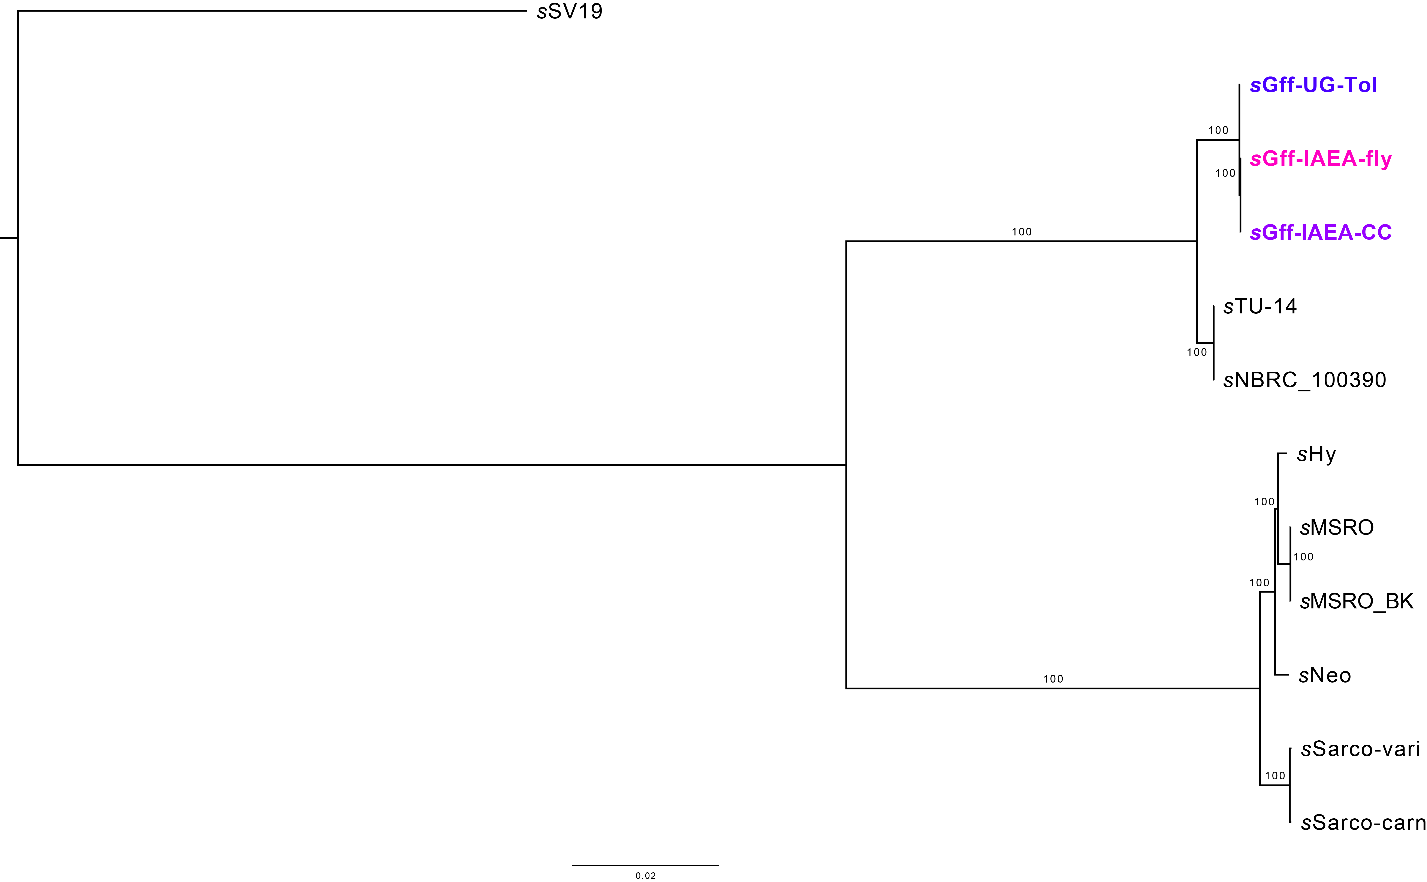


**Supplementary Figure 2**. A RAxML tree showing the relationship between *s*Gff and members of the *Spiroplasma poulsonii* clade. Bootstrap values are listed on branches, and the tree is midpoint rooted.


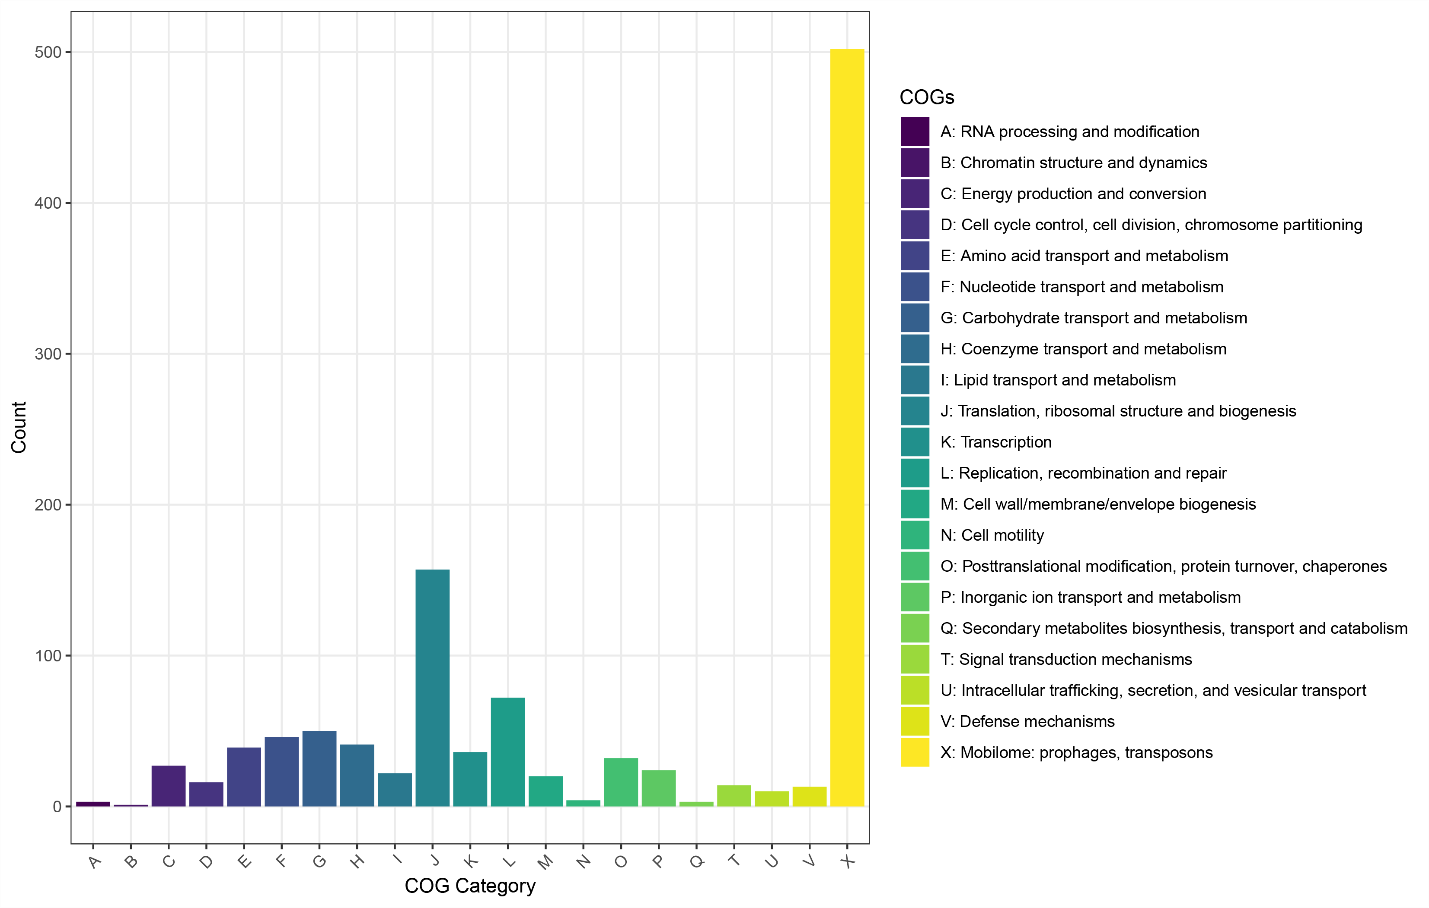


**Supplementary Figure 3**. A COG plot representing the functional categories of *s*Gff genes. 646 *s*Gff genes had unknown COG annotations and were not shown on this plot.


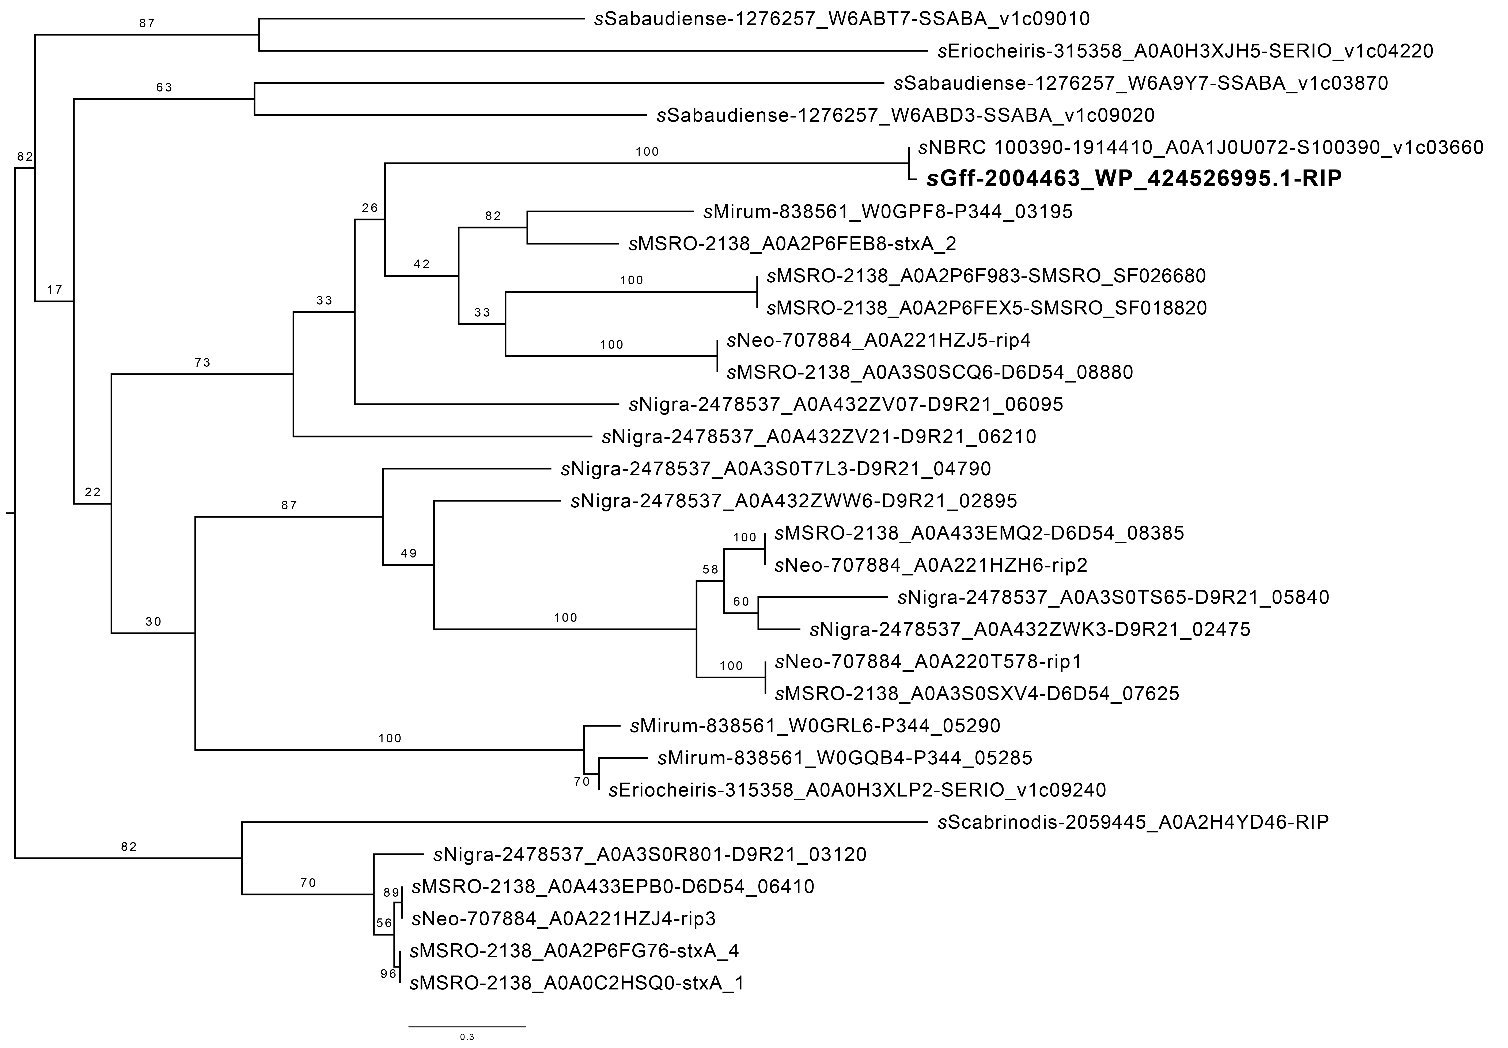


**Supplementary Figure 4**. RAxML tree of *Spiroplasma* RIP domains. The *s*Gff RIP is sister to *s*NBRC_100390, further supporting their sister taxa status. Bootstrap support values are listed on branches, and the tree is midpoint rooted. Each tip name contains the *Spiroplasma* strain, the NCBI tax id, the InterPro accession, and the gene name (see supplementary Table 3 for details).
