# Supplementary material for: Comparative genomics and transcriptomics of the Spiroplasma glossinidia strain sGff reveal insights into host interaction and trypanosome resistance in Glossina fuscipes fuscipes
Source: Research Square preprint supplement (doi:10.21203/rs.3.rs-7295611/v1), 2025-08-25
Supplement: Supplementary file 2 [file f2e13c5555b6debf559385aa.xlsx]

## Sheet: S1
Supplementary Table 1. PCR primers and cycle conditions.
Primer	Sequence (5'-3')	Ta (°C)	Product size (bp)	Cycling conditions	Reference
Spiroplasma_qPCR	F: ATGGCCTACCAAGACAATGATAC	56	138	Initial denaturation: 95°C, 2 min. 40 cycles: 95°C, 5 sec. 56°C 30 sec + plate read. Melt curve 65°C-95°C	this study
	R: CCTTACAACAGACCTTTACA
Tsetse β-tubulin_qPCR	F: GATGGTCAAGTGCGATCCT	56	355		Van Den Abbeele et al. 2010
	R: TGAGAACTCGCCTTCTTCC
Spiroplasma 16S rRNA	F: GGGTGAGTAACACGTATCT	55	1000	Initial denaturation: 95°C, 3 min. 35 cycles: 95°C, 30 sec. 55°C, 30 sec. 72°C, 1 min. Final extension: 72°C, 10 min.	Schneider et al. 2019
	R: CCTTCCTCTAGCTTACACTA
Tsetse β-tubulin	F: ACGTATTCATTTCCCTTTGG R: AATGGCTGTGGTGTTGGACAAC	55	350		Hao et al. 2003

## Sheet: S2
Supplementary Table 2. Key symbiosis reference genes used for BLAST.
gene	NCBI_product_accession
cifA_Type I wMel	WP_010962721.1
cifA_Type II wRi	WP_012673228.1
cifA_Type III wNo	WP_015587806.1
cifA_Type IV wAlbB	WP_006012794.1
cifA_Type V wTri-2	WP_220467453.1
cifA_Type V wBor	UID81778.1
cifA_Type V wStri-1	WP_063631187.1
cifA_Type V wStri-2	WP_063631193.1
cifA_Type V wDacB	OAM06111.1
cifB_Type I wMel	WP_010962722.1
cifB_Type II wRi	WP_012673227.1
cifB_Type III wNo	WP_015587805.1
cifB_Type IV wAlbB	WP_006012795.1
cifB_Type V wTri-2	WP_182365036.1
cifB_Type V wBor	WP_190321312.1
cifB_Type V wStri-1	WP_063631188.1
cifB_Type V wStri-2	WP_063631194.1
cifB_Type V wDacB	OAM06112.1
SPAID	WP_181382065
SPAID	TLF27115
SPAID	MBP1525763
SPAID	MBH8623986
SPAID	WP_127093336
SPAID	WP_126821351
SPAID	WP_105629072
SPAID	WP_215826514
ETX/MTX toxins	WP_174480936
ETX/MTX toxins	WP_233214973
ETX/MTX toxins	MBP1526787
ETX/MTX toxins	MBH8623444
ETX/MTX toxins	WP_127093323
ETX/MTX toxins	WP_127092276
ETX/MTX toxins	WP_126821455
ETX/MTX toxins	WP_126821430
ETX/MTX toxins	WP_126821436
ETX/MTX toxins	WP_164028580
ETX/MTX toxins	WP_164028568
ETX/MTX toxins	WP_025363201
ETX/MTX toxins	WP_047791883
ETX/MTX toxins	WP_047791882
ETX/MTX toxins	WP_004028746
ETX/MTX toxins	WP_004028747
ETX/MTX toxins	WP_047797230
ETX/MTX toxins	WP_148552338
ETX/MTX toxins	WP_070406861
ETX/MTX toxins	WP_162475799
ETX/MTX toxins	WP_162475817
ETX/MTX toxins	WP_105299071
ETX/MTX toxins	WP_215826303
ETX/MTX toxins	WP_215826173
ETX/MTX toxins	WP_215826158
ETX/MTX toxins	WP_215825805
ETX/MTX toxins	MBW1242054
ankyrin repeats	WP_105629072
ankyrin repeats	WP_146186733
ankyrin repeats	WP_109285133
ankyrin repeats	MBP1524984
ankyrin repeats	MBP1525411
ankyrin repeats	MBP1525412
ankyrin repeats	MBP1525410
ankyrin repeats	MBP1525444
ankyrin repeats	MBP1525445
ankyrin repeats	MBP1525469
ankyrin repeats	MBP1526009
ankyrin repeats	WP_215825920
ankyrin repeats	WP_215826809
ankyrin repeats	WP_215826464
ankyrin repeats	WP_174481319
ankyrin repeats	WP_174480144
ankyrin repeats	WP_174480996
ankyrin repeats	WP_174481160
ankyrin repeats	CAB1054856
ankyrin repeats	WP_174481449
SpARP1	PQM30487.1
SpARP2	PQM31362.1
SpARP3	PQM32359.1
SpARP4	PQM32518.1
SpARP5	PTQ58142.1
ClsA	PQM30340.1
ChiD1	PQM31047.1
GlpO	PQM31974.1
GlpF	WP_004027689.1
Spiralin [Spiroplasma citri]	CAJ43425.1
Spiralin SpiA	PQM31479.1
Spiralin SpiB	PQM31163.1
Spiralin SpiC	PQM31738.1
chitinase Chi1	WP_235601002
chitinase Chi2	WP_064513229
YenB	WP_064513231
YenC1	WP_064513233
YenC2	CAM3571773
YenA1	WP_120806232
YenA2	WP_064513227

## Sheet: S3
Supplementary table 3. InterPro accessions for Spiroplasma RIP sequences.
Accession	Source Database	Name	Tax ID	Tax Name	Length	Entry Accession	Matches	gene	strain	name
A0A0C2HSQ0	unreviewed	Shiga toxin subunit A	2138	Spiroplasma poulsonii	448	IPR036041	206..419	stxA_1	sMSRO	sMSRO-2138_A0A0C2HSQ0-stxA_1
A0A0H3XJH5	unreviewed	Uncharacterized protein	315358	Spiroplasma eriocheiris	259	IPR036041	81..255	SERIO_v1c04220	sEriocheiris	sEriocheiris-315358_A0A0H3XJH5-SERIO_v1c04220
A0A0H3XLP2	unreviewed	Uncharacterized protein	315358	Spiroplasma eriocheiris	190	IPR036041	12..169	SERIO_v1c09240	sEriocheiris	sEriocheiris-315358_A0A0H3XLP2-SERIO_v1c09240
A0A1J0U072	unreviewed	Uncharacterized protein	1914410	Spiroplasma sp. NBRC 100390	397	IPR036041	65..256	S100390_v1c03660	sNBRC 100390	sNBRC 100390-1914410_A0A1J0U072-S100390_v1c03660
A0A220T578	unreviewed	Ribosome-inactivating protein	707884	Spiroplasma endosymbiont of Drosophila neotestacea	396	IPR036041	143..370	rip1	sNeo	sNeo-707884_A0A220T578-rip1
A0A221HZH6	unreviewed	Ribosome-inactivating protein 2	707884	Spiroplasma endosymbiont of Drosophila neotestacea	411	IPR036041	147..386	rip2	sNeo	sNeo-707884_A0A221HZH6-rip2
A0A221HZJ4	unreviewed	Ribosome-inactivating protein 3	707884	Spiroplasma endosymbiont of Drosophila neotestacea	486	IPR036041	236..461	rip3	sNeo	sNeo-707884_A0A221HZJ4-rip3
A0A221HZJ5	unreviewed	Ribosome-inactivating protein 4	707884	Spiroplasma endosymbiont of Drosophila neotestacea	496	IPR036041	104..282	rip4	sNeo	sNeo-707884_A0A221HZJ5-rip4
A0A2H4YD46	unreviewed	Ribosome-inactivating protein	2059445	Spiroplasma endosymbiont of Myrmica scabrinodis	391	IPR036041	119..331	RIP	sScabrinodis	sScabrinodis-2059445_A0A2H4YD46-RIP
A0A2P6F983	unreviewed	Ribosome inactivating protein	2138	Spiroplasma poulsonii	103	IPR036041	2..85	SMSRO_SF026680	sMSRO	sMSRO-2138_A0A2P6F983-SMSRO_SF026680
A0A2P6FEB8	unreviewed	Shiga toxin subunit A	2138	Spiroplasma poulsonii	465	IPR036041	115..259	stxA_2	sMSRO	sMSRO-2138_A0A2P6FEB8-stxA_2
A0A2P6FEX5	unreviewed	Ribosome inactivating protein	2138	Spiroplasma poulsonii	496	IPR036041	96..299	SMSRO_SF018820	sMSRO	sMSRO-2138_A0A2P6FEX5-SMSRO_SF018820
A0A2P6FG76	unreviewed	Shiga toxin subunit A	2138	Spiroplasma poulsonii	448	IPR036041	206..421	stxA_4	sMSRO	sMSRO-2138_A0A2P6FG76-stxA_4
A0A3S0R801	unreviewed	Uncharacterized protein	2478537	Spiroplasma endosymbiont of Megaselia nigra	207	IPR036041	13..201	D9R21_03120	sNigra	sNigra-2478537_A0A3S0R801-D9R21_03120
A0A3S0SCQ6	unreviewed	Uncharacterized protein	2138	Spiroplasma poulsonii	496	IPR036041	104..282	D6D54_08880	sMSRO	sMSRO-2138_A0A3S0SCQ6-D6D54_08880
A0A3S0SXV4	unreviewed	Uncharacterized protein	2138	Spiroplasma poulsonii	396	IPR036041	143..370	D6D54_07625	sMSRO	sMSRO-2138_A0A3S0SXV4-D6D54_07625
A0A3S0T7L3	unreviewed	Uncharacterized protein	2478537	Spiroplasma endosymbiont of Megaselia nigra	314	IPR036041	130..299	D9R21_04790	sNigra	sNigra-2478537_A0A3S0T7L3-D9R21_04790
A0A3S0TS65	unreviewed	Uncharacterized protein	2478537	Spiroplasma endosymbiont of Megaselia nigra	399	IPR036041	137..365	D9R21_05840	sNigra	sNigra-2478537_A0A3S0TS65-D9R21_05840
A0A432ZV07	unreviewed	Uncharacterized protein	2478537	Spiroplasma endosymbiont of Megaselia nigra	495	IPR036041	78..296	D9R21_06095	sNigra	sNigra-2478537_A0A432ZV07-D9R21_06095
A0A432ZV21	unreviewed	Uncharacterized protein	2478537	Spiroplasma endosymbiont of Megaselia nigra	539	IPR036041	142..309	D9R21_06210	sNigra	sNigra-2478537_A0A432ZV21-D9R21_06210
A0A432ZWK3	unreviewed	Uncharacterized protein	2478537	Spiroplasma endosymbiont of Megaselia nigra	396	IPR036041	121..362	D9R21_02475	sNigra	sNigra-2478537_A0A432ZWK3-D9R21_02475
A0A432ZWW6	unreviewed	Uncharacterized protein	2478537	Spiroplasma endosymbiont of Megaselia nigra	441	IPR036041	224..410	D9R21_02895	sNigra	sNigra-2478537_A0A432ZWW6-D9R21_02895
A0A433EMQ2	unreviewed	Uncharacterized protein	2138	Spiroplasma poulsonii	411	IPR036041	147..386	D6D54_08385	sMSRO	sMSRO-2138_A0A433EMQ2-D6D54_08385
A0A433EPB0	unreviewed	Uncharacterized protein	2138	Spiroplasma poulsonii	348	IPR036041	98..321	D6D54_06410	sMSRO	sMSRO-2138_A0A433EPB0-D6D54_06410
W0GPF8	unreviewed	Uncharacterized protein	838561	Spiroplasma mirum ATCC 29335	319	IPR036041	87..284	P344_03195	sMirum	sMirum-838561_W0GPF8-P344_03195
W0GQB4	unreviewed	Uncharacterized protein	838561	Spiroplasma mirum ATCC 29335	151	IPR036041	70..128	P344_05285	sMirum	sMirum-838561_W0GQB4-P344_05285
W0GRL6	unreviewed	Uncharacterized protein	838561	Spiroplasma mirum ATCC 29335	60	IPR036041	4..59	P344_05290	sMirum	sMirum-838561_W0GRL6-P344_05290
W6A9Y7	unreviewed	Uncharacterized protein	1276257	Spiroplasma sabaudiense Ar-1343	284	IPR036041	113..259	SSABA_v1c03870	sSabaudiense	sSabaudiense-1276257_W6A9Y7-SSABA_v1c03870
W6ABD3	unreviewed	Uncharacterized protein	1276257	Spiroplasma sabaudiense Ar-1343	265	IPR036041	82..250	SSABA_v1c09020	sSabaudiense	sSabaudiense-1276257_W6ABD3-SSABA_v1c09020
W6ABT7	unreviewed	Uncharacterized protein	1276257	Spiroplasma sabaudiense Ar-1343	270	IPR036041	98..255	SSABA_v1c09010	sSabaudiense	sSabaudiense-1276257_W6ABT7-SSABA_v1c09010

## Sheet: S4
Supplementary Table 4. NCBI accessions for the Spiroplasma reference genomes used to generate RAxML trees.
NCBI_accession	strain	clade	host	host_class	Contigs	Genes
GCF_040940205.1	sDGKH1	Spiroplasma mirum	UNKNOWN-Human Blood infection	unknown	20	1298
GCF_001029245.1	sMirum	Spiroplasma mirum	Atrichopogon sp	insecta	1	1319
GCF_001029265.1	sEriocheiris	Spiroplasma mirum	Eriocheir sinensis	Malacostraca	1	1229
GCF_000400955.1	sSyrphidicola	Spiroplasma chrysopicola	Eristalis arbustorum	insecta	1	1006
GCF_000400935.1	sChrysopicola	Spiroplasma chrysopicola	Chrysops sp	insecta	1	1020
GCF_964019595.1	sSarco-vari	Spiroplasma poulsonii	Sarcophaga variegata	insecta	1	2136
GCF_965178695.1	sSarco-carn	Spiroplasma poulsonii	Sarcophaga carnaria	insecta	2	2182
GCF_022569815.1	sHy	Spiroplasma poulsonii	Drosophila hydei	insecta	6	1706
GCF_009866525.1	sMSRO_BK	Spiroplasma poulsonii	Drosophila melanogaster	insecta	2	2175
GCF_000820525.2	sMSRO	Spiroplasma poulsonii	Drosophila melanogaster	insecta	8	2832
GCA_019325155.1	sNeo	Spiroplasma poulsonii	Drosophila neotestacea	insecta	19	1990
GCF_001792795.1	sTU-14	Spiroplasma poulsonii	UNKNOWN- culture contaminate	unknown	1	1039
GCF_001886495.1	sNBRC_100390	Spiroplasma poulsonii	Atrichopogon sp	insecta	1	1039
GCF_030060925.1	sSV19	Spiroplasma poulsonii	Stegodyphus dumicola	Arachnida	1	1366
GCF_964263245.1	sPoly-f	Spiroplasma polydrusus	Polydrusus formosus	insecta	1	1433
GCF_964019755.1	sPoly-c	Spiroplasma polydrusus	Polydrusus cervinus	insecta	1	1241
GCF_029607405.2	sCitri-D4	Spiroplasma citri	Neoaliturus haematoceps	insecta/plant	2	2141
GCF_010587255.1	sCitri-BLH-13	Spiroplasma citri	Neoaliturus tenellus	insecta/plant	9	2438
GCF_029607425.2	sCitri-D10	Spiroplasma citri	Citrus sinensis	insecta/plant	2	2112
GCF_002968355.1	sChiS	Spiroplasma citri	Cichorium intybus	plant	324	1964
GCF_000236085.2	sMelliferum	Spiroplasma citri	Apis mellifera	insecta	6	1255
GCF_964030655.1	sPoecilobothrus	Spiroplasma phoeniceum	Poecilobothrus nobilitatus	insecta	1	1481
GCF_964020235.1	sSeladonia	Spiroplasma phoeniceum	Seladonia tumulorum	insecta	1	2577
GCF_964020965.1	sAmmophila	Spiroplasma phoeniceum	Ammophila pubescens	insecta	1	2128
GCF_044714365.1	sHy2	Spiroplasma phoeniceum	Drosophila hydei	insecta	384	1260
GCF_044714355.1	sAld	Spiroplasma phoeniceum	Drosophila aldrichi	insecta	202	1133
GCF_016082285.1	sMoj	Spiroplasma phoeniceum	Drosophila mojavensis	insecta	174	985
GCF_003339775.1	sPhoeniceum	Spiroplasma phoeniceum	Catharanthus roseus	plant	4	2376
GCF_001274875.1	sKunkelii	Spiroplasma phoeniceum	Zea mays	plant	4	1791
GCF_003987485.1	sNigra	Spiroplasma phoeniceum	Megaselia nigra	insecta	329	1472

## Sheet: S5
Supplementary Table 5. Fold-change mean and standard deviation of injection experiments.
Dose	Day	n	mean_fold_change	sd_fold_change
PosCtrl	0	6	2.45155	1.40011
PosCtrl	1	6	3.9884	3.702
PosCtrl	6	6	2.48987	0.792295
PosCtrl	9	4	8.0562	9.41576
PosCtrl	14	3	11.104	15.2815
Low	0	6	0.0139381	0.00597344
Low	1	6	0.0107466	0.00440063
Low	6	6	0.592463	0.36907
Low	9	6	7.10707	4.98784
Low	14	6	10.3056	6.95288
High	0	6	2.30021	1.42303
High	1	5	2.20447	0.796746
High	6	6	7.63263	3.97978
High	9	5	19.671	12.9083
High	14	5	20.4335	7.71429

## Sheet: S6
Supplementary Table 6. Kruskal-Wallis test between groups of injection experiments.
Day	n	statistic	df	p
0	18	11.4152	2	0.00332
1	17	11.5176	2	0.00315
6	18	14.3626	2	0.000761
9	15	3.98083	2	0.137
14	14	3.24	2	0.198

## Sheet: S7
Supplementary Table 7. Kruskal-Wallis test within groups of injection experiments.
Dose	n	statistic	df	p
PosCtrl	25	1.51846	4	0.823
Low	30	25.3075	4	4.36e-05
High	27	20.2513	4	0.000445

## Sheet: S8
Supplementary Table 8. Dunn's post-hoc test between groups of injection experiments.
Day	group1	group2	n1	n2	p	p.adj_(BH)	p.adj.signif
0	PosCtrl	Low	6	6	0.002461	0.007382	**
0	PosCtrl	High	6	6	0.828758	0.828758	ns
0	Low	High	6	6	0.004926	0.007389	**
1	PosCtrl	Low	6	6	0.00112	0.00336	**
1	PosCtrl	High	6	5	0.471847	0.471847	ns
1	Low	High	6	5	0.01697	0.025455	*
6	PosCtrl	Low	6	6	0.039898	0.059847	ns
6	PosCtrl	High	6	6	0.083566	0.083566	ns
6	Low	High	6	6	0.000154	0.000461	***
9	PosCtrl	Low	4	6	0.707454	0.707454	ns
9	PosCtrl	High	4	5	0.069268	0.16028	ns
9	Low	High	6	5	0.106853	0.16028	ns
14	PosCtrl	Low	3	6	1	1	ns
14	PosCtrl	High	3	5	0.169202	0.253803	ns
14	Low	High	6	5	0.09731	0.253803	ns

## Sheet: S9
Supplementary Table 9. Dunn's post-hoc test within groups of injection experiments.
Dose	group1	group2	n1	n2	p	p.adj_(BH)	p.adj.signif
PosCtrl	0	1	6	6	0.480177	0.846996	ns
PosCtrl	0	6	6	6	0.844519	0.846996	ns
PosCtrl	0	9	6	4	0.409693	0.846996	ns
PosCtrl	0	14	6	3	0.32081	0.846996	ns
PosCtrl	1	6	6	6	0.61012	0.846996	ns
PosCtrl	1	9	6	4	0.846996	0.846996	ns
PosCtrl	1	14	6	3	0.677166	0.846996	ns
PosCtrl	6	9	6	4	0.516324	0.846996	ns
PosCtrl	6	14	6	3	0.405033	0.846996	ns
PosCtrl	9	14	4	3	0.824022	0.846996	ns
Low	0	1	6	6	0.693954	0.771059	ns
Low	0	6	6	6	0.115492	0.144365	ns
Low	0	9	6	6	0.00131106	0.00327766	**
Low	0	14	6	6	0.000509186	0.00169729	**
Low	1	6	6	6	0.0491282	0.0953082	ns
Low	1	9	6	6	0.000309707	0.00154854	**
Low	1	14	6	6	0.000109116	0.00109116	**
Low	6	9	6	6	0.101096	0.144365	ns
Low	6	14	6	6	0.0571849	0.0953082	ns
Low	9	14	6	6	0.793067	0.793067	ns
High	0	1	6	5	0.889681	0.889681	ns
High	0	6	6	6	0.0747308	0.124551	ns
High	0	9	6	5	0.00249586	0.00623965	**
High	0	14	6	5	0.000916003	0.00471843	**
High	1	6	5	6	0.0660792	0.124551	ns
High	1	9	5	5	0.00246249	0.00623965	**
High	1	14	5	5	0.000943685	0.00471843	**
High	6	9	6	5	0.185282	0.231603	ns
High	6	14	6	5	0.106105	0.151578	ns
High	9	14	5	5	0.780332	0.867035	ns

## Sheet: S10
Supplementary Table 10. Gene families unique to the sGff-IAEA assemblies that are not found in sGff-UG-Tol. Functional annotations were assigned by Bakta.
Gene	Location	Product
SMSRO_RS05415	chrom	L-threonine dehydratase catabolic TdcB
CXB60_07620	chrom	DUF87 domain-containing protein
ACOBWH_RS00625	chrom	Metallothionein
ACOBWH_RS01665	chrom	hypothetical protein
ACP194_04785	chrom	Adhesin P123
SMSRO_RS05510	chrom	Lipoprotein
ACOBWH_RS05310	chrom	Lipoprotein
ACOBWH_RS04595	chrom	Lipoprotein
ACP194_02675	chrom	Lipoprotein
ACOBWH_RS08185	chrom	hypothetical protein
ACOBWH_RS04200	chrom	hypothetical protein
ACOBWH_RS04560	chrom	hypothetical protein
ACOBWH_RS00320	chrom	hypothetical protein
ACOBWH_RS00545	chrom	hypothetical protein
ACOBWH_RS00620	chrom	hypothetical protein
ACOBWH_RS07645	chrom	hypothetical protein
ACOBWH_RS07820	chrom	hypothetical protein
ACOBWH_RS01635	chrom	hypothetical protein
AACK91_RS07550	chrom	Spiroplasmavirus-related protein
CXB60_09900	chrom	Mbov_0395 family pilin-like conjugal transfer protein
MNU24_RS00190	chrom	Mbov_0396 family ICE element transmembrane protein
ACOBWH_RS07410	chrom	Spiroplasma plectrovirus-related protein
ACOBWH_RS07815	chrom	IS3 family transposase
CXB60_10470	chrom	Mbov_0396 family ICE element transmembrane protein
CXB60_10560	chrom	Mbov_0397 family ICE element conjugal transfer ATPase
ACP194_00445	chrom	Plectrovirus-related protein
ACP194_08720	p_sGff2	Antitoxin
ACP194_08725	p_sGff2	SOJ-like protein
ACP194_08740	p_sGff2	hypothetical protein
ACP194_08775	p_sGff2	Replication-relaxation
ACOBWH_RS09100	p_sGff2	Adhesion related protein, transmembrane
ACOBWH_RS09145	p_sGff2	hypothetical protein
ACOBWH_RS08895	p_sGff3	Spiroplasmavirus-related protein
ACOBWH_RS08900	p_sGff3	SOJ-like protein
ACOBWH_RS08905	p_sGff3	Spiroplasma plectrovirus-related protein
ACOBWH_RS08910	p_sGff3	Adhesion related protein, transmembrane
ACOBWH_RS08950	p_sGff3	hypothetical protein
ACOBWH_RS09065	p_sGff4	hypothetical protein

[truncated: 12 more sheets: S11, S12, S13, S14, S15, S16, S17, S18, S19, S20, S21, S22]
